# Supplementary material for: Polymorphs and isostructural cocrystals of dexamethasone: towards the improvement of aqueous solubility
Source: Royal Society of Chemistry journal article supplement (doi:10.1039/d2ce00781a), 2022-01-01
Supplement: d2ce00781a1.pdf [file d2ce00781a1.pdf]

## Supporting information

### **Polymorphs and Isostructural Cocrystals of Dexamethasone: Towards the improvement of aqueous solubility**

Richu Bagya Varsa S<sup>a</sup>, Palash Sanphui,<sup>\*a</sup> Vladimir Chernyshev<sup>\*b,c</sup>

<sup>a</sup>Department of Chemistry, Faculty of Engineering and Technology, SRM Institute of Science and Technology, Chennai, Tamil Nadu 603203, India. E-mail: palashi@srmist.edu.in

<sup>b</sup>Department of Chemistry, M. V. Lomonosov Moscow State University, 1-3 Leninskie Gory, Moscow 119991, Russian Federation. E-mail: vladimir@struct.chem.msu.ru

<sup>c</sup>A. N. Frumkin Institute of Physical Chemistry and Electrochemistry RAS, 31 Leninsky Prospect, Moscow 119071, Russian Federation

## Table of contents

|                                                                                               |  |
|-----------------------------------------------------------------------------------------------|--|
| 1. Table S1. Hydrogen bond geometry.....                                                      |  |
| 2. Table S2. Summary of the reported steroid cocrystals/salts structure.....                  |  |
| 3. Fig. S1. Polarized microscope images of DEX concomitant polymorphs.....                    |  |
| 4. Fig. S2. TGA endotherms of DEX–CAT and DEX–RES cocrystals.....                             |  |
| 4. Fig. S3. Packing differences between Forms A and B.....                                    |  |
| 5. Fig. S4. Overlay of molecular conformations of DEX polymorphs.....                         |  |
| 6. Fig. S5. The Rietveld plots of (a) DEX–CAT and (b) DEX–RES cocrystals.....                 |  |
| 7. Fig. S6. 3D packing view of (a) DEX–CAT and (b) DEX–RES cocrystals.....                    |  |
| 8. Fig. S7. X-ray powder pattern of (a) DEX+ORC, (b) DEX+PYR, (c) DEX+PGL ground mixture.     |  |
| 9. Fig. S8. H-bonding aspects of (a) progesterone-resorcinol (refcode-PRORES), (b) DEX-RES... |  |
| 10. Fig. S9. UV absorbance spectra of the DEX Forms A/B and DEX-CAT/RES cocrystals..          |  |
| 11. Fig. S10. XRD comparison of DEX–CAT/RES cocrystals following 2h dissolution.....          |  |
| 12. Fig. S11. XRD comparison of DEX–CAT/RES cocrystals under humidity conditions.....         |  |

**Table S1.** Hydrogen bond geometry (Å, °)

| DEX (Form A) | D-H...A       | D-H/ Å | H...A/Å | D...A/Å   | D-H...A/° | Symmetry code    |
|--------------|---------------|--------|---------|-----------|-----------|------------------|
|              | O2-H2...O1    | 0.82   | 2.17    | 2.6395(2) | 116       | Intramolecular   |
|              | O3-H3...O5    | 0.82   | 2.17    | 2.9383(2) | 155       | x,1+y,z          |
|              | O4-H4...O2    | 0.82   | 2.19    | 3.0076(2) | 146       | -x,-1/2+y,1/2-z  |
|              | C18-H18B...O4 | 0.96   | 2.24    | 2.8762(2) | 123       | Intramolecular   |
| DEX (Form B) | O1-H1...O10   | 0.82   | 2.15    | 2.9366(3) | 160       | 3/2-x,1-y,-1/2+z |
|              | O4-H13...O9   | 0.82   | 2.07    | 2.8230(3) | 153       | 1/2+x,1/2-y,-z   |
|              | O6-H30...O3   | 0.82   | 1.99    | 2.7821(3) | 163       | 3/2-x,1-y,-1/2+z |
|              | O8-H36...O2   | 0.82   | 2.02    | 2.8138(3) | 163       | -1/2+x,1/2-y,-z  |
|              | C17-H17...O10 | 0.97   | 2.49    | 3.2999(3) | 141       | 3/2-x,1-y,-1/2+z |
|              | C21-H26...O7  | 0.96   | 2.54    | 3.4414(3) | 156       | 1+x,y,z          |
|              | C39-H48...O3  | 0.97   | 2.52    | 3.3143(3) | 139       | 3/2-x,1-y,-1/2+z |
| DEX-CAT      | O3-H3...O5    | 0.82   | 2.07    | 2.8475(4) | 158       | x,y,-1+z         |
|              | O6-H6...O7    | 0.82   | 2.21    | 2.9416(4) | 149       | 1-x,1/2+y,1-z    |
|              | O7-H7...O2    | 0.82   | 1.81    | 2.5987(3) | 162       | 1-x,-1/2+y,-z    |
|              | O2-H2...O1    | 0.82   | 2.14    | 2.6277(3) | 118       | Intramolecular   |
| DEX-RES      | O3-H3...O5    | 0.82   | 2.26    | 3.0598(4) | 164       | x,y,1+z          |
|              | O6-H6...O6    | 0.82   | 2.58    | 3.2285(4) | 137       | -x,1/2+y,1-z     |
|              | O7-H7...O2    | 0.82   | 2.20    | 3.0111(4) | 168       | x,-1+y,z         |
|              | C5-H5A...O5   | 0.96   | 2.46    | 2.8623(4) | 105       | x,y,1+z          |
|              | C5-H15A...O5  | 0.97   | 2.60    | 3.5411(5) | 163       | 1-x,-1/2+y,-z    |
|              | C24-H24...O2  | 0.93   | 2.47    | 3.2569(4) | 142       | x,-1+y,z         |

|  |              |      |      |           |     |              |
|--|--------------|------|------|-----------|-----|--------------|
|  | C26-H26...O7 | 0.93 | 2.34 | 3.1443(4) | 144 | -x,1/2+y,2-z |
|--|--------------|------|------|-----------|-----|--------------|

**Table S2.** Steroid cocrystals/salts structure (reported)

| Sl. No | Steroid           | Coformer used with CCDC refcodes/nos                                                                                                                                                                             | References                                                                                          |
|--------|-------------------|------------------------------------------------------------------------------------------------------------------------------------------------------------------------------------------------------------------|-----------------------------------------------------------------------------------------------------|
| 1.     | Nandrolone        | Salicylic acid (LUYHAR),<br>3-Amino-1,2,4-Triazole (LUYHEV)                                                                                                                                                      | Iqbal et al., J. Mol. Struct. 2021, 1224, 128981. DOI: 10.1016/j.molstruc.2020.128981               |
| 2.     | Diosgenin         | Piperazine (PACVEY)                                                                                                                                                                                              | Gong et al., Natural Products and Bioprospecting 2020, 10, 261–267. DOI: 10.1007/s13659-020-00256-y |
| 3.     | Cholic acid       | Melamine (TALDIV)                                                                                                                                                                                                | Ikonen et al., CrystEngComm 2010, 12, 4304. DOI: 10.1039/c0ce00108b                                 |
| 4.     | Stanozolol        | Malonic acid (VOPCOU),<br>Phenylacetic Acid (VOPFAJ),<br>6-Hydroxy-2-Naphthoic Acid (VOPCUA).                                                                                                                    | Norberg et al., Cryst. Growth Des. 2014, 14, 7, 3408–3422<br>DOI: 10.1021/cg500358h                 |
|        |                   | Saccharin (salt/EYAYOU),<br>Acesulfame (salt/EYAYUA)                                                                                                                                                             | Kong et al., CrystEngComm, 2016,18, 8739-8746<br>DOI: 10.1039/C6CE01876A                            |
|        |                   | 2,5-dihydroxybenzoic acid (JIWJEH),<br>2,6- dihydroxybenzoic acid (salt/JIWJAD),<br>Phthalic Acid (JIWJIL),<br>Gallic acid (salt/JIWJAD).                                                                        | Wang et al., CrystEngComm, 2019, 21, 2144<br>DOI: 10.1039/c8ce01439f                                |
| 5.     | Estradiol         | Benzoquinoline (RUFYIC),<br>1,2-Dimethylnaphthalene (RUFYOI),<br>Phenanthrene (RUGYID)<br>Pyrene (CUTBEZ)<br>Urea (ESOURE10)<br>Isonicotinamide (ULUFIS)<br>Piperazine (ULUFOY)<br>Perfluoronaphthalene (RUGYEZ) | Ardila-Fierro et al. Cryst. Growth & Des. 2015, 15, 1492-1501.<br>DOI: 10.1021/cg501865h            |
| 6      | Ethinyl estradiol | Nicotinamide,<br>Piperazine,<br>Tetramethylpyrazine,<br>4,4'-bipyridine<br>Imidazole (CCDC nos 1938507-11)                                                                                                       | Du et al., New J. Chem., 2019, 43, 16889-16897<br>DOI: 10.1039/C9NJ04147H                           |
| 7      | Estradiol         | Urea (ESOURE10)                                                                                                                                                                                                  | Duax et al. Acta Cryst. B, 1972, 28, 1864-1871, DOI: 10.1107/S0567740872005151                      |

|    |                     |                                                                                                                       |                                                                                                                        |
|----|---------------------|-----------------------------------------------------------------------------------------------------------------------|------------------------------------------------------------------------------------------------------------------------|
|    |                     | Acetamide (CCDC no.: 1910680)                                                                                         | Gong e al., Zeitschrift für Kristallographie- New Crystal Structures, 2020, 235, 31-34.<br>DOI: 10.1515/ncrs-2019-0451 |
|    |                     | Isonicotinamide (ULUFIS)<br>Piperazine (ULUFOY)                                                                       | Wang et al., CrystEngComm, 2016,18, 3498-3505<br>DOI: 10.1039/C6CE00433D                                               |
| 8  | Progesterone        | 9-phenanthrol (CUSZAS),<br>Gentisic acid (CUSZIA),<br>2,7-dihydroxynaphthalene<br>(CUSZEW), 4-bromophenol<br>(CUSYOF) | Friscic et al., Proc. Nat. Acad. Sci. USA 2010, 107, 13216, DOI: 10.1073/pnas.0915142107                               |
|    |                     | 4-hydroxybenzoic acid (CCDC nos 1571644-5)                                                                            | Samipillai et al., J. Crystal Growth 2019, 507, 270-282.<br>DOI: 10.1016/j.jcrysgro.2018.10.050                        |
|    |                     | Phloroglucinol (YUKQAZ/YUKVAZ),<br>Resveratrol (YUKQED)                                                               | Guo et al., Cryst. Growth Des. 2020, 20, 3053–3063<br>DOI: 10.1021/acs.cgd.9b01688                                     |
|    |                     | Hydroquinone (KEFBEC)                                                                                                 | Galdecki et al., J. Crystallogr. Spectrosc. Res., 1989, 19, 983-991. DOI: 10.1007/BF01160880                           |
|    |                     | Resorcinol (PRORES)                                                                                                   | Dideberg et al., Acta Crystallogr., 1975, B31, 637-640, DOI: 10.1107/S0567740875003524                                 |
|    |                     | Pregnenolone (TIPMAH)                                                                                                 | Lancaster et al., J. Pharm. Sci., 2007, 96, 3419-3431. DOI: 10.1002/jps.20983                                          |
| 9  | Pregnenolone        | 4-iodophenol (WOMGOV)<br>2,4,6-trichlorophenol (CCDC 687158)                                                          | Bhatt et al., CrystEngComm 2008, 10, 1747-1749. DOI: 10.1039/B810643F                                                  |
|    |                     | 2-Naphthol (CUTBAV)<br>4-bromophenol (CUTBOJ)                                                                         | Friscic et al., Proc. Nat. Acad. Sci. USA 2010, 107, 13216, DOI: 10.1073/pnas.0915142107                               |
| 10 | Cholesterol         | 4-iodophenol (WOMHAI)                                                                                                 | Bhatt et al., CrystEngComm 2008, 10, 1747-1749. DOI: 10.1039/B810643F                                                  |
| 11 | $\beta$ -sitosterol | Propionic acid,<br>Zymonic acid,<br>Gallic acid (ZUQJON),<br>4-hydroxybenzoic acid,<br>3,4-dihydroxybenzoic acid.     | Barbas et al., CrystEngComm, 2020, 22, 4210-4214<br>DOI: 10.1039/D0CE00704H                                            |
| 12 | Exemestane          | 1-hydroxypyrene (KURBUX/KURCAE)<br>9-hydroxyphenanthrene (KURBOR)                                                     | Topić et al., Canadian J. Chem. 2020, 98, 386-393.<br>DOI: 10.1139/cjc-2020-0073                                       |
|    |                     | Thiourea (CCDC nos 1970916-7)                                                                                         | Fatima et al., IUCrJ 2020, 7, 105-112<br>DOI: 10.1107/S2052252519016142                                                |

|    |                   |                       |                                                                                 |
|----|-------------------|-----------------------|---------------------------------------------------------------------------------|
|    |                   | Maleic acid (HORNAE), | Shiraki et al., Pharm. Res. 2008, 25, 2581–2592. DOI: 10.1007/s11095-008-9676-2 |
| 13 | Megestrol acetate | Saccharin (HORNEI)    |                                                                                 |

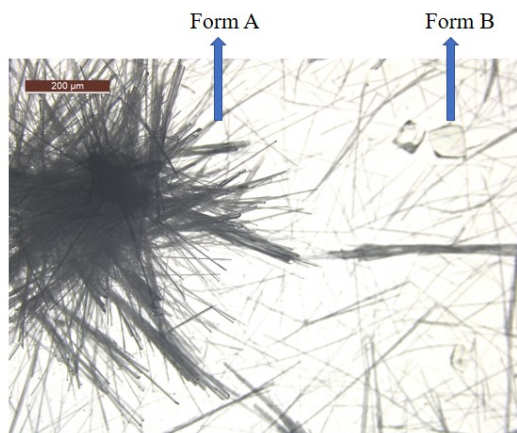

**Fig. S1.** DEX polymorphs (needle-Form A, square plate-Form B) crystallized concomitantly from acetonitrile.

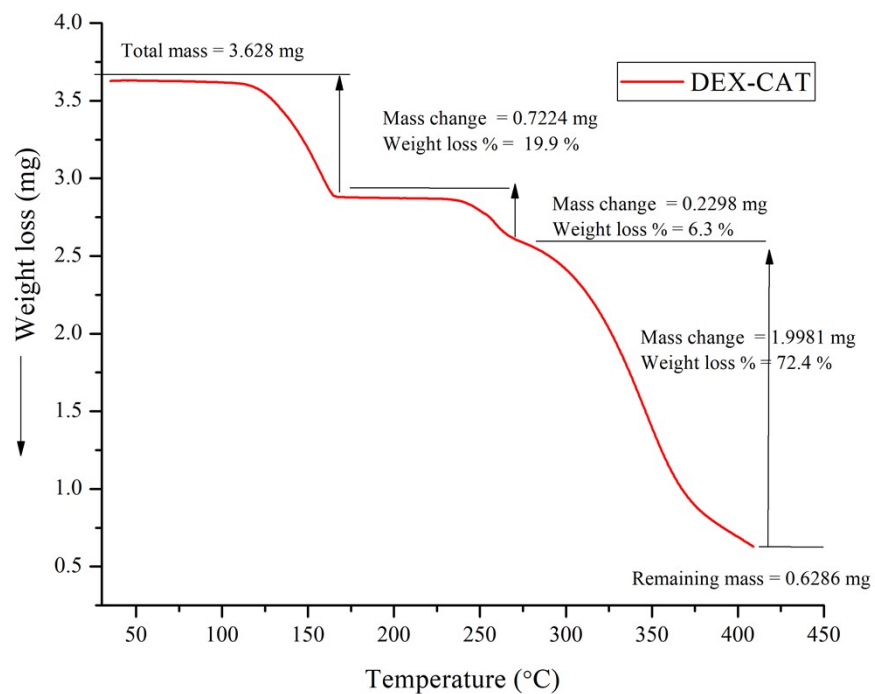

(a)

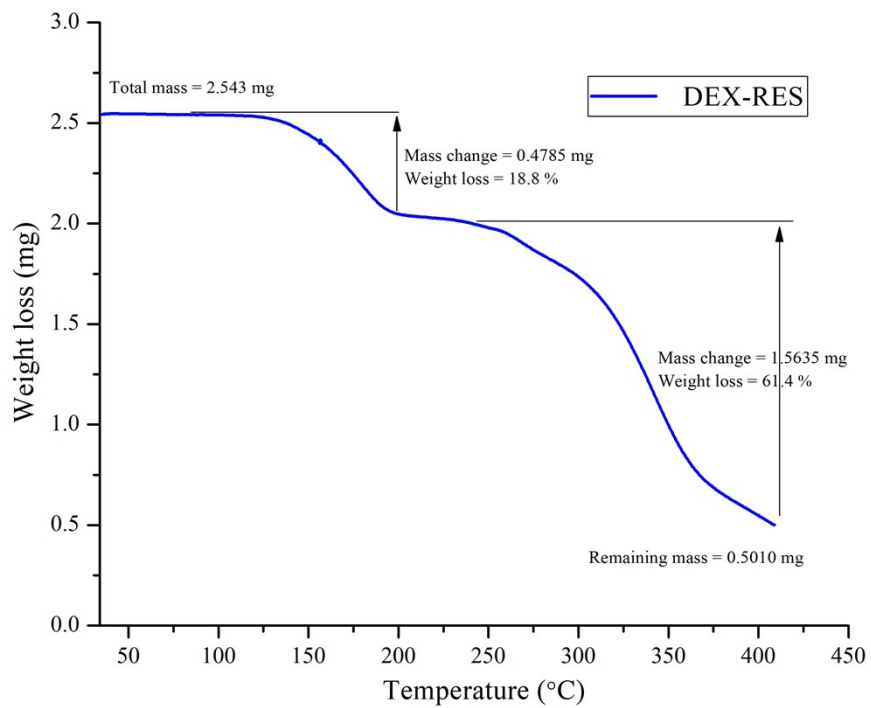

(b)

**Fig. S2.** TGA data of (a) DEX-CAT and (b) DEX-RES cocrystals confirmed the possible thermal degradation.

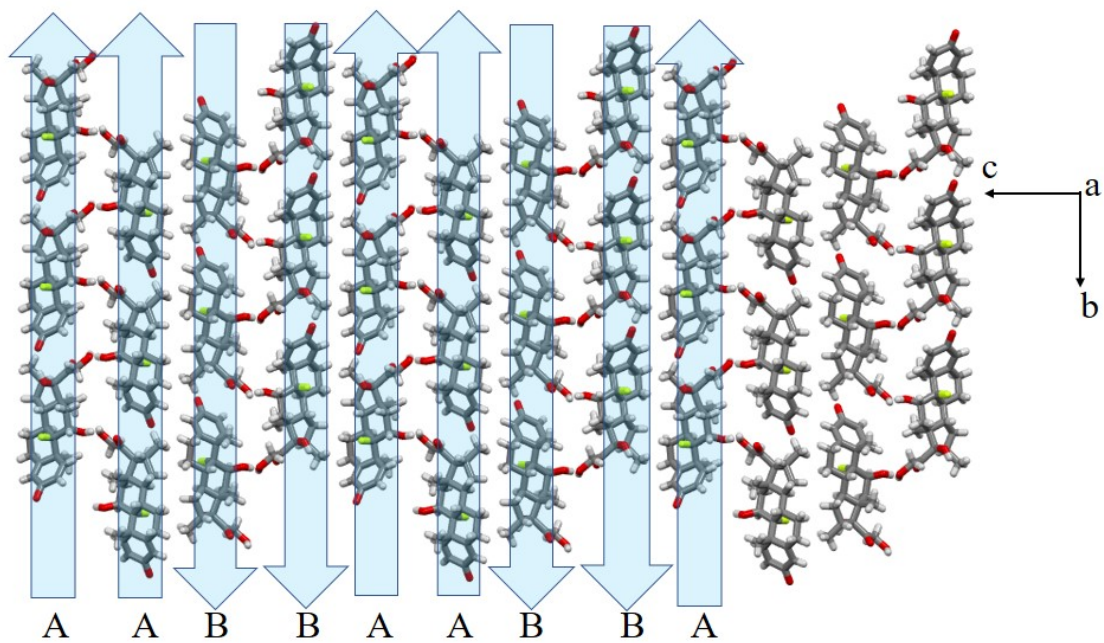

(a)

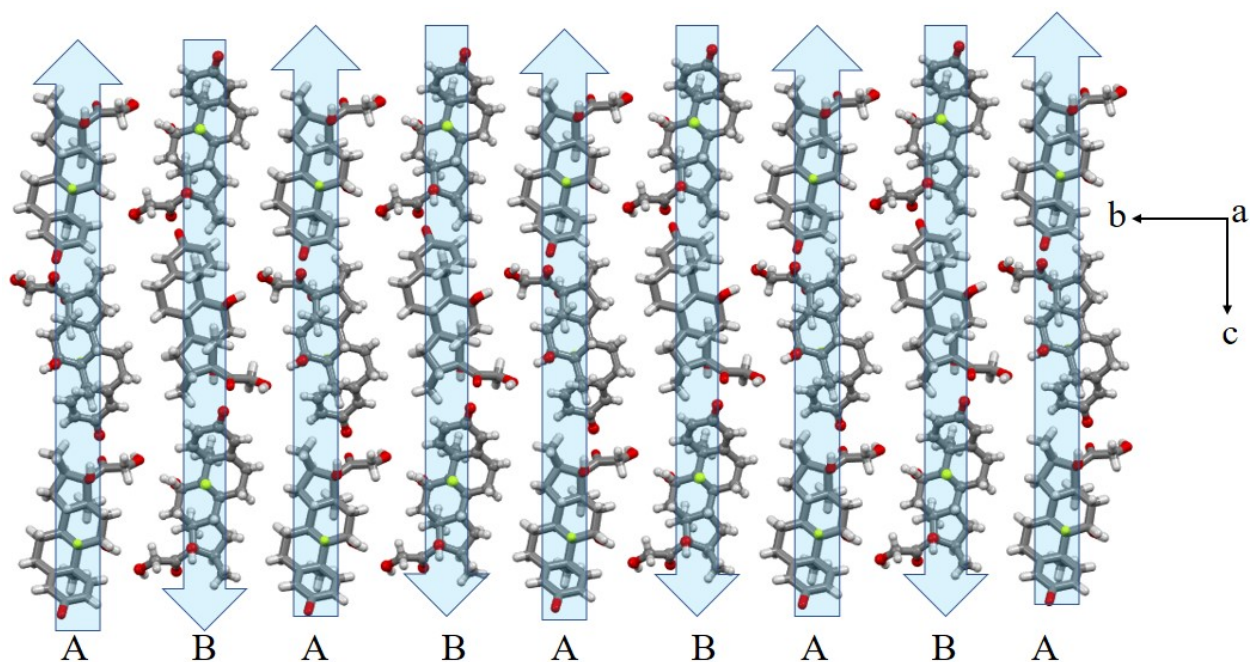

(b)

**Fig. S3.** Packing differences between Form A and B. Form A maintains AABB patterns, whereas Form B maintains ABAB patterns of DEX chains viewed down the  $a$  axis. The direction of arrow is assumed starting from carbonyl towards terminal OH groups as **A**, wherein opposite arrow is assumed as **B**.

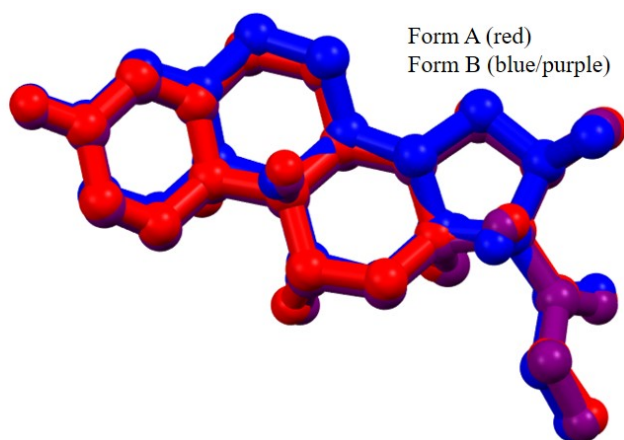

**Fig. S4.** Overlay of molecular conformations of DEX (three) symmetry independent molecules in two forms A/B that indicates no conformational flexibility even in the presence of eight chiral centers and four aliphatic cyclic rings.



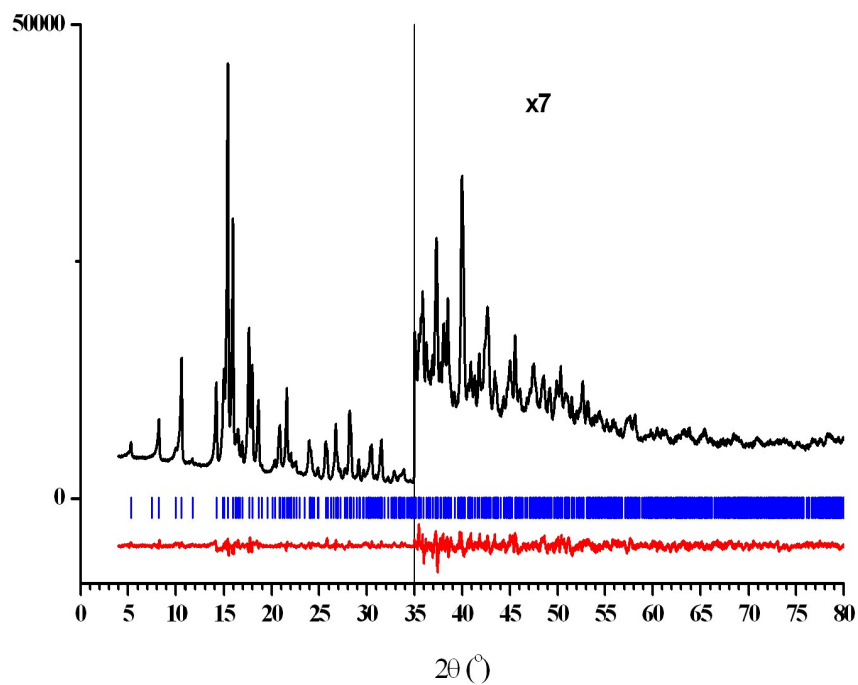

(a)

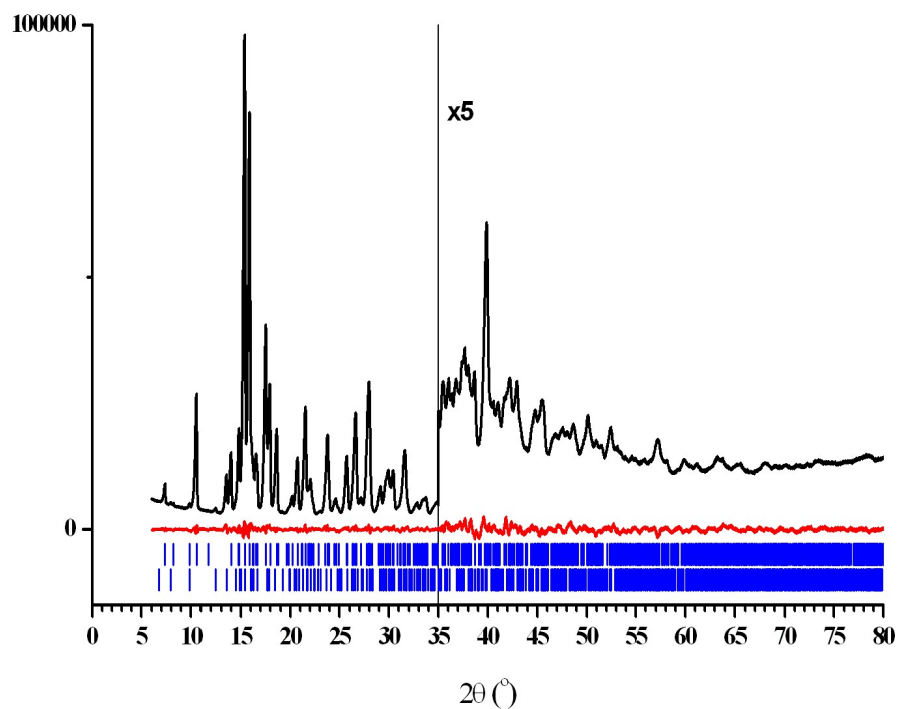

(b)

**Fig. S5.** The Rietveld plot after the final bond-restrained refinement for (a) DEX-CAT and (b) DEX-RES cocrystals showing the experimental and difference diffraction profiles as black (top) and red (bottom) curves, respectively. The vertical blue bars correspond to the calculated positions of the Bragg peaks.

**Note:** In the final bond-restrained Rietveld refinement of DEX-RES, two crystalline phases were taken into account, namely, DEX-RES and DEX (Form A). For DEX Form A, the atomic coordinates were fixed to the known values (CCDC deposition 2118348). For DEX-RES, except for the atomic coordinates only two independent *U*<sub>iso</sub> values for non-H atoms were refined – one common *U*<sub>iso</sub> for DEX molecule, another one for RES molecule. H atoms were placed in calculated positions and not refined. The experimental and calculated diffraction profiles after the final two-phase bond-restrained Rietveld refinement are shown in Fig. S5b [in the Legend - The vertical blue bars correspond to the calculated positions of the Bragg peaks for two crystalline phases - DEX-RES (1st row) and DEX-Form A (2nd row)]. The content of DEX (Form A) in the DEX-RES sample was estimated as approx. 7%.

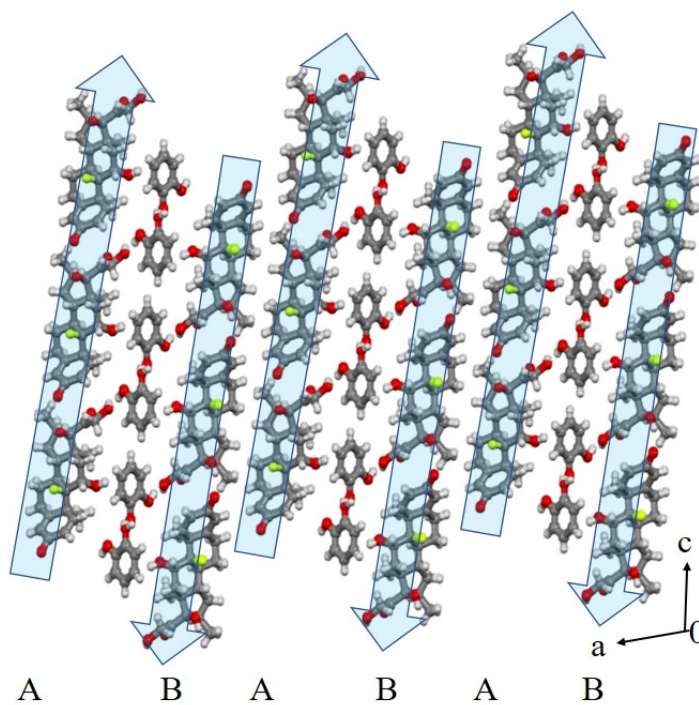

(a)

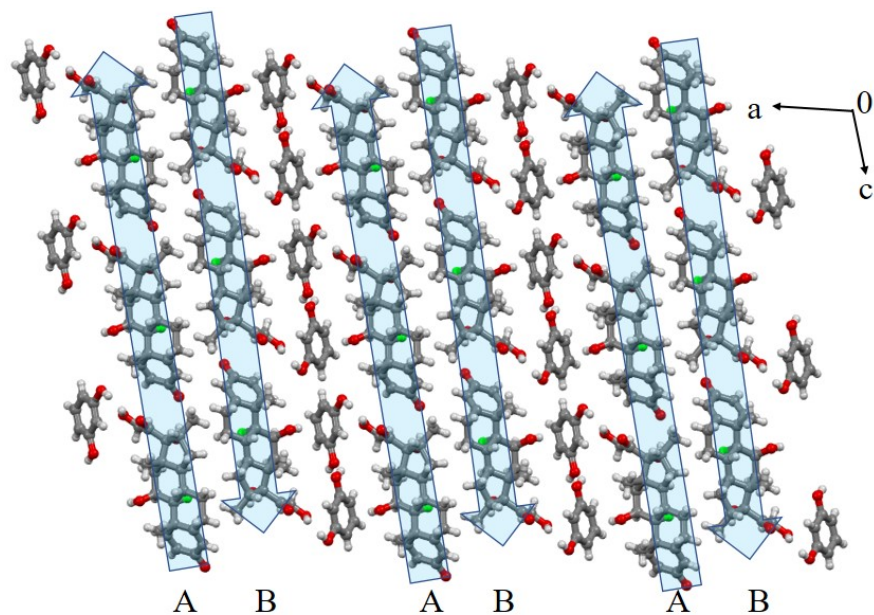

(b)

**Fig. S6.** 3D packing view of (a) DEX–CAT and (b) DEX–RES cocrystals down the *b* axis indicate DEX molecule arranged in an alternate fashion (ABAB), which is similar to DEX Form B.

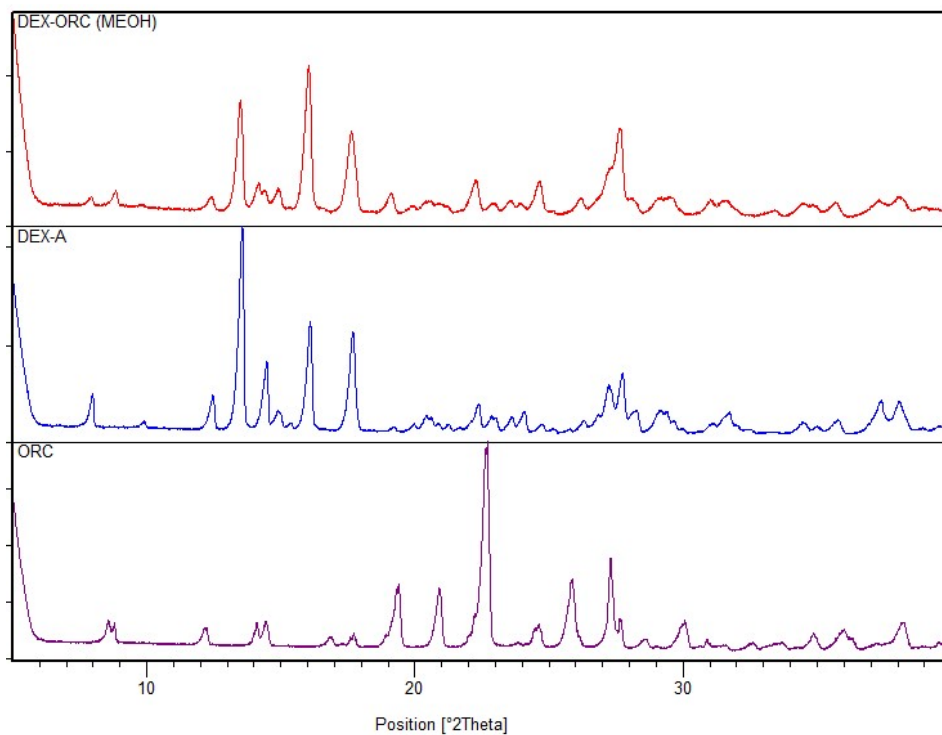

(a)

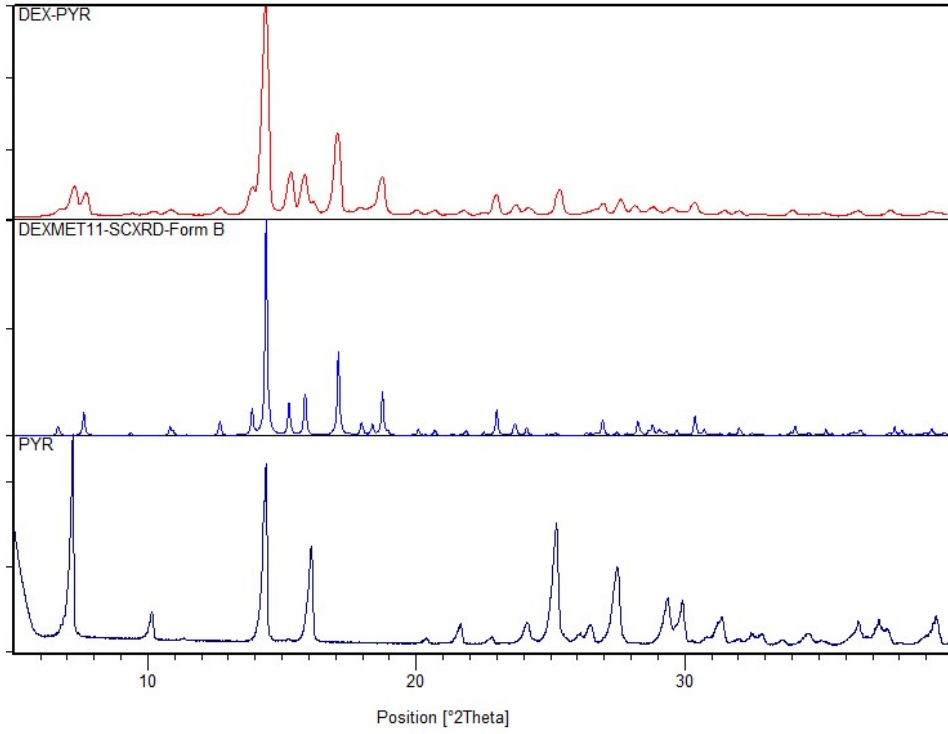

(a)

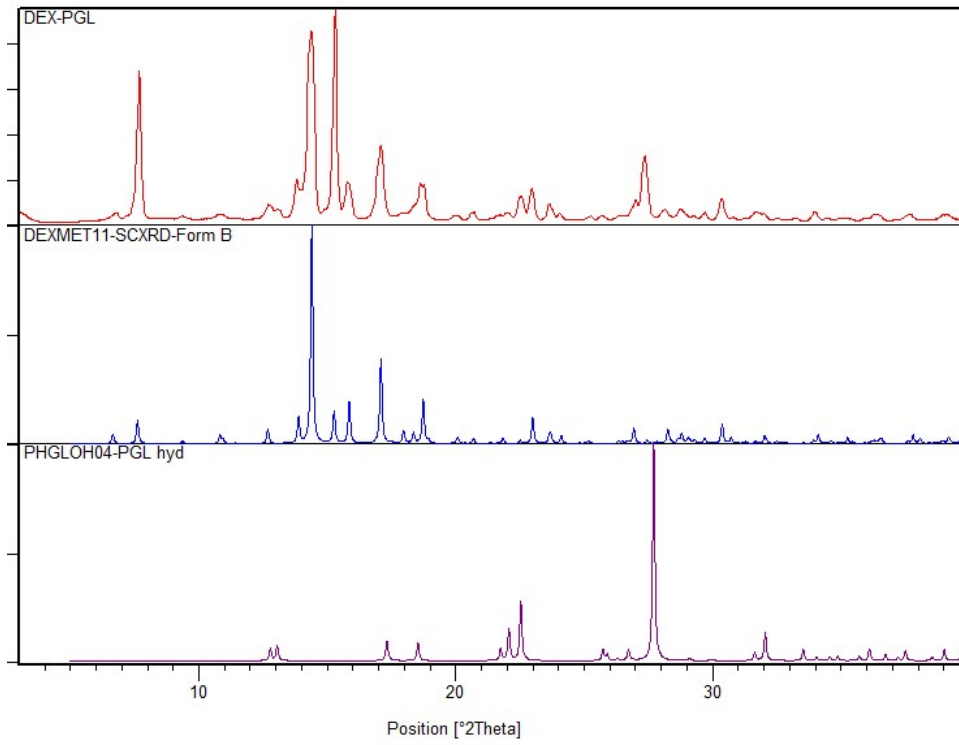

(b)

**Fig. S7.** X-ray powder pattern of (a) DEX-ORC, (b) DEX-PYR, (c) DEX-PGL suggest that there are two-phase sample of either DEX Form A or Form B (DEXMET11) and PYR/PGL hydrate (PHGLOH04).

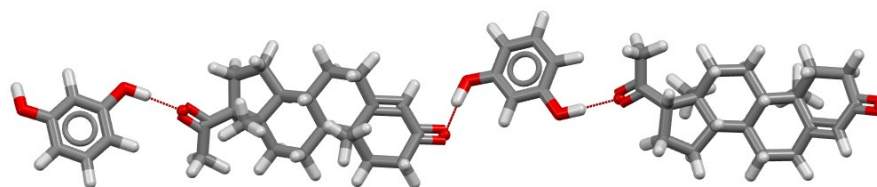

(a)

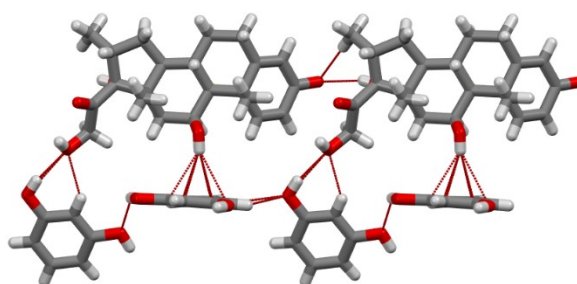

(b)

**Fig. S8.** Hydrogen bonding aspects of (a) progesterone–resorcinol (refcode-PRORES), (b) DEX–RES cocrystals.

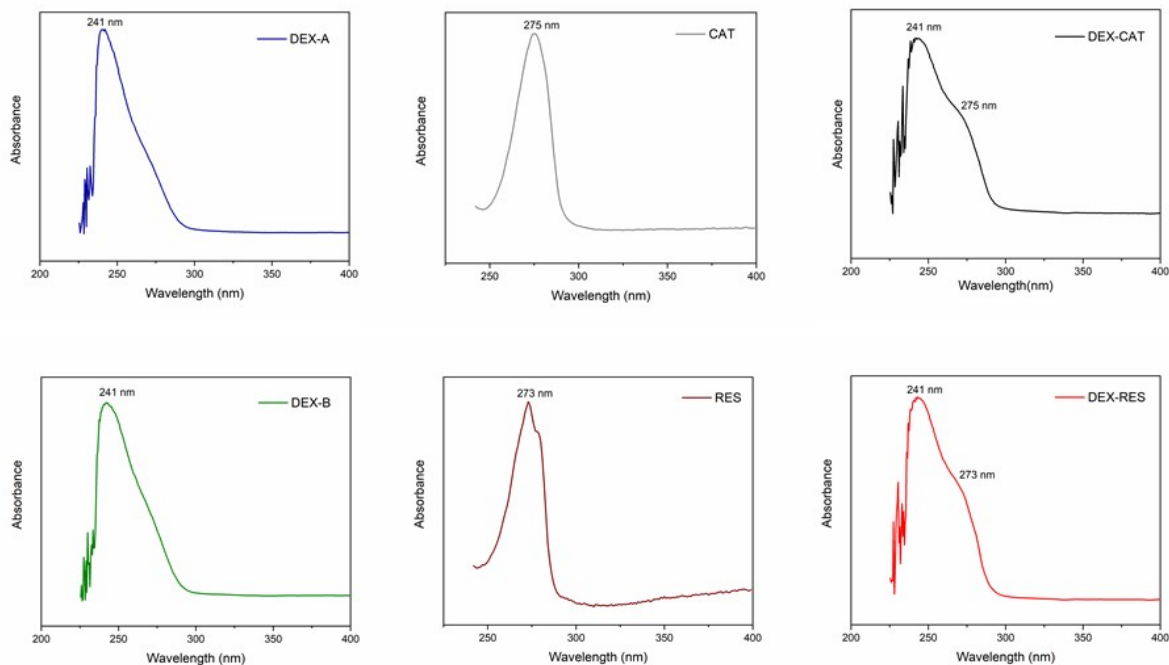

**Fig. S9.** UV absorbance spectra of the DEX Forms A/B and DEX-CAT/RES cocrystals that showed the negligible interference in the UV region of 241 nm, where the drug is absorbed.

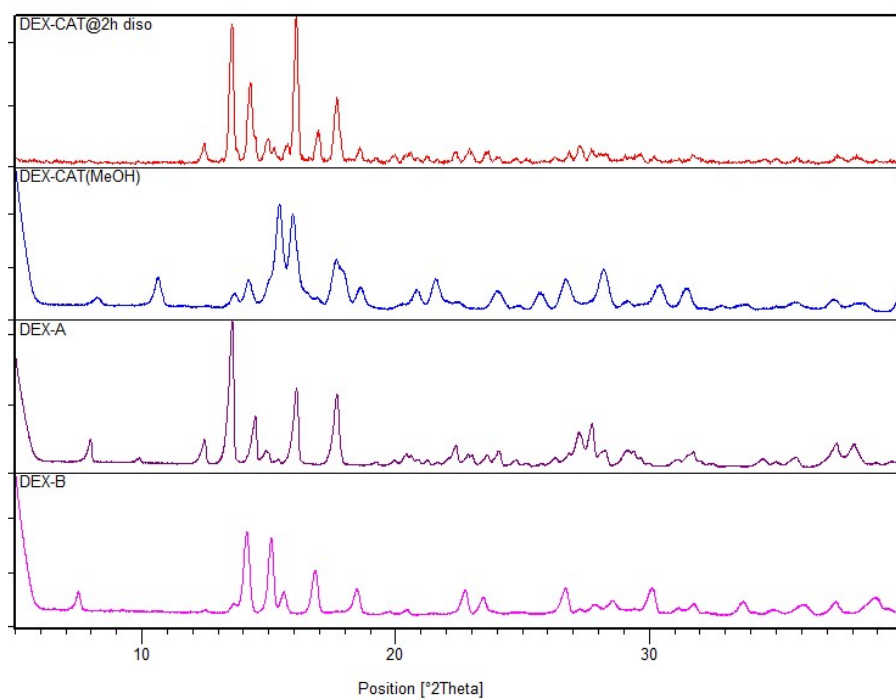

(a)

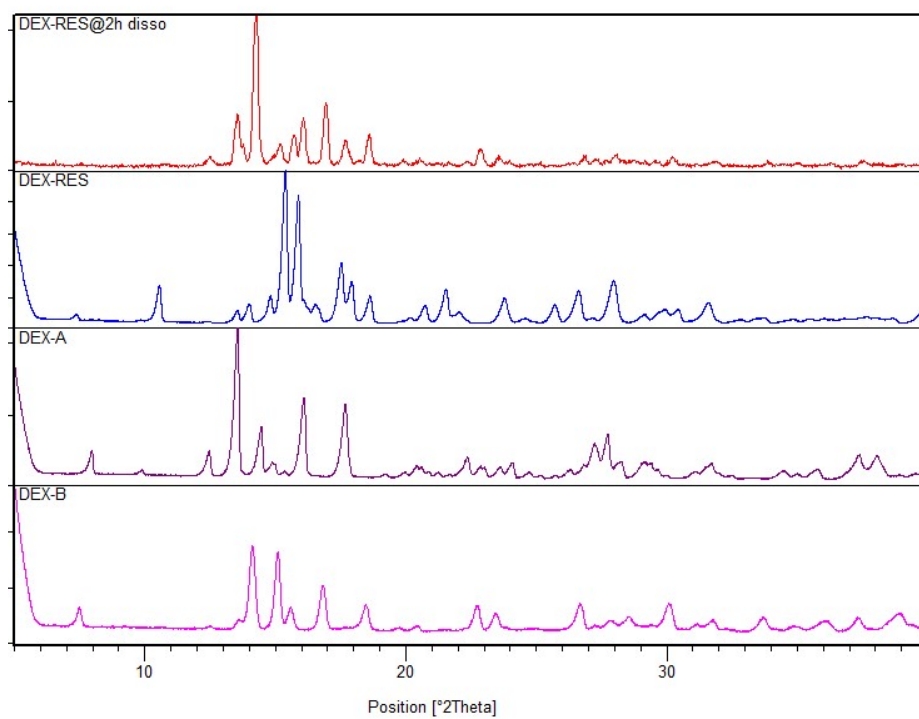

(b)

**Fig. S10.** XRD comparison of (a) DEX–CAT and (b) DEX–RES cocrystals (following 2h dissolution studies) that indicated the possible transformation to the mixture of polymorphs

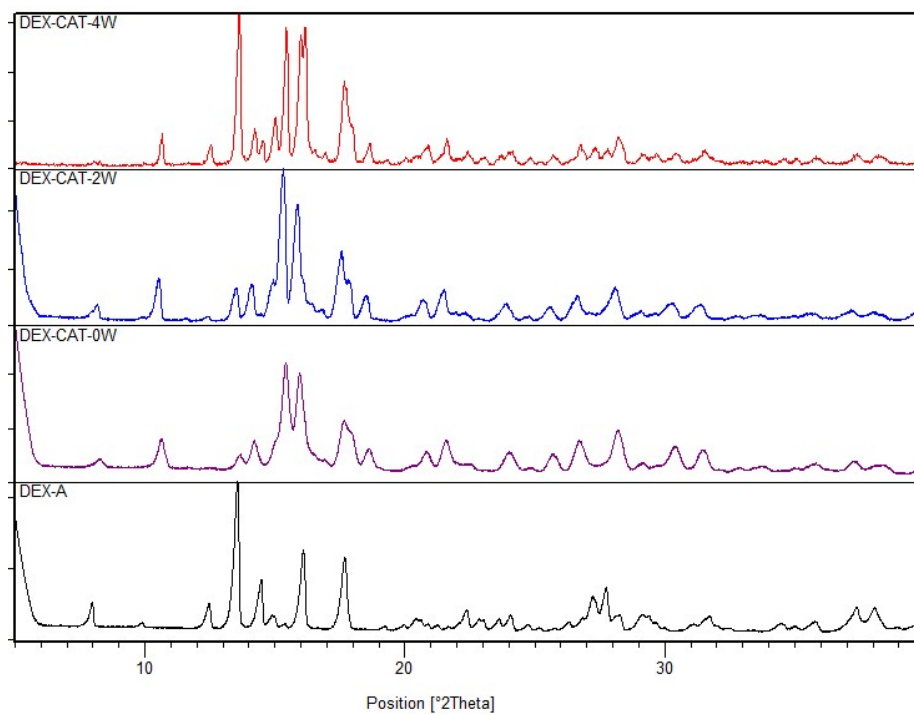

(a)

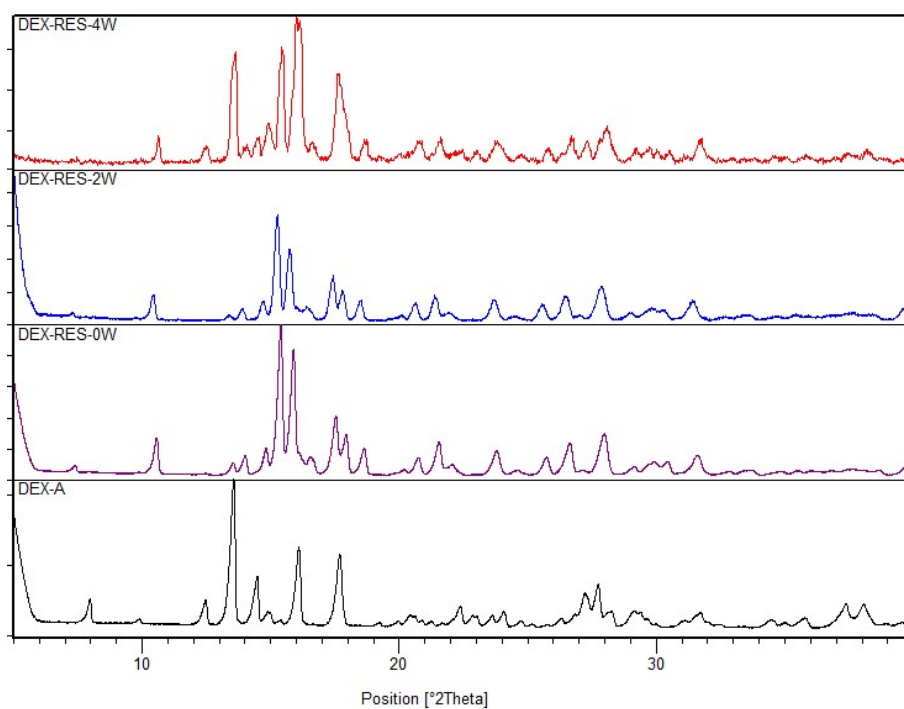

(b)

**Fig. S11.** XRD comparison of (a) DEX-CAT and (b) DEX-RES cocrystals stored at  $35 \pm 5$  °C and 75% relative humidity that showed partial transformation to DEX Form after 2-4 weeks.
